# Supplementary material for: The Prophage and Plasmid Mobilome as a Likely Driver of Mycobacterium abscessus Diversity
Source: PubMed Central journal article supplement (PMC8092301; doi:10.1128/mbio.03441-20), 2021-03-30
Supplement: mBio.03441-20-st001.pdf [file mBio.03441-20-st001.pdf]

Table S1. *attB* sites in *M. abscessus*

|                   | Core sequence <sup>1</sup>                                                                                                                                                   | Int   | attB                                    | attB                                                                                                             | ATCC1997 coordinates                     |
|-------------------|------------------------------------------------------------------------------------------------------------------------------------------------------------------------------|-------|-----------------------------------------|------------------------------------------------------------------------------------------------------------------|------------------------------------------|
| MabA-1            | GGGGCGGTAGCTCAGTTGGTTAGAGCCGTGGACTCATAATCC (e.g. GD11-1)<br>CTGGTGCGCCGTCAGGGGCTCGAACCCCGGACCCGCTGATTAAGAGTC (GD43A-1)                                                       | Int-Y | attB-5                                  | Mab_t5028; 5' half of tRNA-met                                                                                   | 1754373 (tRNA-met)                       |
| MabA-2            | GCGGACTTAAAATCCGCCAAGTGTCCGGTTCGAGTCCGACTGGGGGCAC                                                                                                                            | Int-Y | attB-18                                 | Mab_t5022c; 3' end tRNA-Lys                                                                                      | 1550157                                  |
| MabA-3            | GGGGCGGTAGCTCAGTTGGTTAGAGCCGTGGACTCATAATCC                                                                                                                                   | Int-Y | attB-15                                 | Mab_t5019; tRNA-Leu                                                                                              | 1191297                                  |
| MabB              | GTAATGAATAGGTCAGGGGTTTCGATTCCCTGGGTGGCTC                                                                                                                                     | Int-Y | attB-5                                  | Mab_t5028; 5' half of tRNA-met                                                                                   | 1754373 (tRNA-met)                       |
| MabC              | TACTCGTGAGTAAGAACT (e.g. GD13-2)<br>TACTTTCGAGTAAGGTA (e.g. GD33-1)                                                                                                          | Int-Y | attB-2                                  | Mab_t5010; 3' end tRNA-Thr                                                                                       | 490925 (tRNA-thr)                        |
| MabD              | CGAGAAGGTCAGGGGTTTCGATTCCCTTAGCTCCACCAA (GD17)<br><b>C</b> AGAGACAAAAATCCCAGG <b>T</b> CGTCTGACCT <b>G</b> GGATTATGGTGGAGCTAAGGGGACTCGAA<br>CCCCTGACCCCAACA (GD12-2, GD05-1) | Int-Y | attB-13<br>attB-12<br>attB-3<br>attB-10 | Extreme 5' end of Mab_3947<br>Extreme 5' end of Mab_3824<br>Mab_t5017; 3' end tRNA-ala<br>Mab_t5041; 3' tRNA-ala | 3995698<br>3869544<br>1102715<br>3491796 |
| MabE-1            | AGCATCCGACTGTTAATCGGACGGTTATTGGTTCGAGTCCAATCGGGGAGC (GD04-1)                                                                                                                 | Int-Y | attB-4                                  | Mab_t5027 (tRNA-asn)                                                                                             | 1739368                                  |
| MabE-2            | CCCAGAGGTCGCAGGTTCAAATCCTGTCCCGCTACTAGGT                                                                                                                                     | Int-Y | attB-16                                 | Mab_t5042; tRNA-met                                                                                              | 3537993                                  |
| MabF              | ATCGAGAAGGTCAGGGGTTTCGATTCCCTTAGCTCCAC (GD08-3)                                                                                                                              |       | attB-3                                  | Mab_t5017; 3' end tRNA-ala                                                                                       | 1102713 (tRNA-ala)                       |
| MabG              | CGGGTTCGAATCCCGGCAGCTCCAC                                                                                                                                                    | Int-Y | attB-11                                 | Intergenic: 3471-3472 (550 bp)                                                                                   | 3513406 (ATCC)                           |
| MabH              | ATT                                                                                                                                                                          | Int-Y | attB-8                                  | Extreme 3' end of Mab_2979                                                                                       | 3039287                                  |
| MabI              | GACTA (GD54-2)<br>GGGCT (GD86-1)                                                                                                                                             | Int-S | attB-9<br>attB-17                       | In Mab_3230c<br>In Mab_3265c                                                                                     | 3265145<br>3302860                       |
| MabJ              | AAGTCGTA                                                                                                                                                                     | Int-S | attB-7                                  | In 5' end of Mab_2445                                                                                            | 2502029                                  |
| MabK <sup>2</sup> | CAGAAGGTTAGGGTTCGAATCCCTTCGGGCGCACCAT                                                                                                                                        | Int-Y | attB-1                                  | Mab_t5006; 3' end tRNA-arg                                                                                       | 233517 (tRNA-arg)                        |
| MabL              | AGGGGTTTCGAGTCCCCTTAGCTCCACCATA (GD88-1)<br>AGGGGTTTCGAGTCCCCTTAGCTCCAC (Bolletii)                                                                                           | Int-Y | attB-10                                 | Mab_t5041c; 3' end tRNA-ala                                                                                      | 3491832 (tRNA-ala)<br>3491836 (tRNA-ala) |
| MabM              | CGGGTTCGAATCCCGGCAGCTCCAC                                                                                                                                                    | Int-Y | attB-11                                 | Intergenic Mab_3471-3472                                                                                         | 3513406                                  |
| MabN              | TACTCGTGAGTAAGAACT                                                                                                                                                           | Int-Y | attB-13                                 | Extreme 5' end of Mab_3947                                                                                       | 3995689                                  |
| MabO              | TACTCTGGAGTAAG                                                                                                                                                               | Int-Y | attB-14                                 | Inter Mab_4442c - 4443                                                                                           | 4519114                                  |
| MabP              | CTGGGGTCAAGTGGTTCGAGGTTCAAATCCTGTCAGCCCGAC                                                                                                                                   | Int-Y | attB-6                                  | MAB_t5033; tRNA-pro                                                                                              | 2431284                                  |
| MabQ              | CGGACGGT <b>A</b> TTGGTTCGAGTCCAATCGGGGAG                                                                                                                                    | Int-Y | attB-4                                  | Mab_t5027; 3' end tRNA-asn                                                                                       | 1739385                                  |

<sup>1</sup>The common core sequence shared between *attP*, *attB*, *attL* and *attR* is shown; mismatches are in bold type.

<sup>2</sup>The attB-1 core is present once in most strains, but twice in ATCC19977 due to insertion of a 16.5 kbp segment, containing some phage-related sequences.
