# Supplementary material for: The Prophage and Plasmid Mobilome as a Likely Driver of Mycobacterium abscessus Diversity
Source: PubMed Central journal article supplement (PMC8092301; doi:10.1128/mbio.03441-20), 2021-03-30
Supplement: mBio.03441-20-st002.pdf [file mBio.03441-20-st002.pdf]

Table S2. Predicted *M. abscessus* prophage immunity groups

| Immunity <sup>1</sup> | Cluster         | Prophages <sup>8</sup>                                                                                                                                                                                                                                                         | attB              | Int <sup>6</sup> | Int-dep Imm? <sup>7</sup> |
|-----------------------|-----------------|--------------------------------------------------------------------------------------------------------------------------------------------------------------------------------------------------------------------------------------------------------------------------------|-------------------|------------------|---------------------------|
| Imm-1                 | MabA1           | prophiATCC19977-1, prophigD15-1, prophigD17-2, prophigD102-1, <i>prophiGD12-1</i> , <i>prophiGD14-1</i> , <i>prophiGD23-1</i> , <i>prophiGD39-1</i> , <i>prophiGD84-1</i>                                                                                                      | attB-5            | Int-Y            | No                        |
| Imm-2                 | MabA1           | prophiGD20-1, prophigD21-2, prophigD22-1, prophigD43A-1, prophigD57-2, <i>prophiGD08-1</i> , <i>prophiGD13-1</i> , <i>prophiGD24-1</i> , <i>prophiGD35-1</i> , <i>prophiGD36-1</i> , <i>prophiGD42-1</i> , <i>prophiGD75-2</i> , <i>prophiGD100A-1</i> , <i>prophiGD100B-1</i> | attB-5            | Int-Y            | No                        |
| Imm-3                 | MabA1           | prophiGD27-1                                                                                                                                                                                                                                                                   | attB-5            | Int-Y            | No                        |
| Imm-4                 | MabA2,<br>MabA3 | prophiGD02-2, prophigD90-1, <i>prophiGD16-2</i><br>prophiGD91-2                                                                                                                                                                                                                | attB-15<br>attB-5 | Int-Y<br>Int-Y   | No<br>No                  |
| Imm-5                 | MabA1           | <i>prophiGD10-1</i> , <i>prophiGD30-1</i> , <i>prophiGD58-2</i>                                                                                                                                                                                                                | attB-5            | Int-Y            | No                        |
| Imm-6                 | MabA1           | prophiGD11-1                                                                                                                                                                                                                                                                   | attB-5            | Int-Y            | No                        |
| Imm-7                 | MabB            | prophiGD08-2, prophigD11-2, prophigD21-1, prophigD42-2, prophigD89-1                                                                                                                                                                                                           | attB-2            | Int-Y            | Yes                       |
| Imm-8                 | MabB            | prophiGD34-2, prophigD43A-2, prophigD62-1                                                                                                                                                                                                                                      | attB-2            | Int-Y            | Yes                       |
| Imm-9 <sup>2</sup>    | MabB            | prophiGD16-1                                                                                                                                                                                                                                                                   | attB-2            | Int-Y            | Yes                       |
| Imm-10                | MabC            | prophiGD13-2, prophigD39-2, prophigD44-1, prophigD51-1, prophigD52-1, prophigD57-1, prophigD91-1, prophigD104-2, <i>prophiGD56-1</i> , <i>prophiGD61-1</i> , <i>prophiGD72-1</i>                                                                                               | attB-13           | Int-Y            | Yes                       |
| Imm-11                | MabC            | prophiGD33-1, prophigD43A-3, prophigD100A-2, <i>prophiGD42-3</i>                                                                                                                                                                                                               | attB-12           | Int-Y            | Yes                       |
| Imm-12                | MabD            | prophiGD05-1, prophigD17-1                                                                                                                                                                                                                                                     | attB-10           | Int-Y            | No                        |
| Imm-13                | MabD            | prophiGD12-2, <i>prophiGD84-2</i>                                                                                                                                                                                                                                              | attB-10           | Int-Y            | No                        |
| Imm-14                | MabE1           | prophiGD25-1, prophigD54-1, prophigD102-2, <i>prophiGD09-1</i> , <i>prophiGD45-1</i> , <i>prophiGD52-2</i>                                                                                                                                                                     | attB-4            | Int-Y            | No                        |
| Imm-15                | MabE1           | <i>prophiGD53-1</i> , prophigD68-1, prophigD04-1, prophigD111-1                                                                                                                                                                                                                | attB-4            | Int-Y            | No                        |
| Imm-16                | MabE2           | prophiGD91-4                                                                                                                                                                                                                                                                   | attB-6            | Int-Y            | No                        |
| Imm-17                | MabF            | prophiGD08-3, prophigD11-3, prophigD62-2                                                                                                                                                                                                                                       | attB-3            | Int-Y            | No                        |
| Imm-18                | MabG            | prophiGD03-1                                                                                                                                                                                                                                                                   | attB-11           | Int-Y            | No                        |
| Imm-19                | MabG            | prophiGD21-3, prophigD24-2, prophigD95-1                                                                                                                                                                                                                                       | attB-11           | Int-Y            | No                        |
| Imm-20                | MabG            | prophiGD58-1                                                                                                                                                                                                                                                                   | attB-11           | Int-Y            | No                        |
| Imm-21                | MabH            | prophiGD05-2, prophigD36-2                                                                                                                                                                                                                                                     | attB-8            | Int-Y            | Yes                       |
| Imm-22                | MabI            | prophiGD54-2<br>prophiGD86-1                                                                                                                                                                                                                                                   | attB-9<br>attB-17 | Int-S<br>Int-S   | No<br>No                  |
| Imm-23                | MabJ            | prophiGD24-3, prophigD43A-4, <i>prophiGD21-4</i> , <i>prophiGD75-1</i>                                                                                                                                                                                                         | attB-7            | Int-S            | No                        |
| Imm-24                | MabK            | prophiGD43A-5                                                                                                                                                                                                                                                                  | attB-1            | Int-Y            | Yes                       |
| Imm-25                | MabL            | prophiBoletti-1                                                                                                                                                                                                                                                                | attB10            | Int-Y            | No                        |
| Imm-26                | MabL            | prophiGD43A-6, prophigD88-1, <i>prophiGD55-1</i> , <i>prophiGD60-1</i>                                                                                                                                                                                                         | attB-10           | Int-Y            | No                        |
| Imm-27 <sup>3</sup>   | MabM            | prophiGD05-3                                                                                                                                                                                                                                                                   | attB-11           | Int-Y            | No                        |
| Imm-28 <sup>4</sup>   | MabN            | prophiGD53-3, prophigD62-3, prophigD69-1, prophigD108-1, <i>prophiGD02-1</i> <i>prophiGD95-2</i>                                                                                                                                                                               | attB-13           | Int-Y            | Yes                       |
| Imm-28 <sup>5</sup>   | MabO            | prophiGD91-3                                                                                                                                                                                                                                                                   | attB-14           | Int-Y            | Yes                       |
| Imm-29                | MabP            | prophiGD51-2                                                                                                                                                                                                                                                                   | attB-6            | Int-Y            | No                        |
| Imm-30                | MabQ            | prophiGD79-1                                                                                                                                                                                                                                                                   | attB-4            | Int-Y            | No                        |

<sup>1</sup>Immunity groups were defined as prophages sharing similar repressors, typically having >90% amino acid identity. Prophages in different immunity groups typically share <70% amino acid identity.

<sup>2</sup>The MabB (Imm-9) repressor in prophigD16-1 is overall 88% aa identical to Imm-7 phages, but differs substantially in the HTH region and is likely heteroimmune.

<sup>3</sup>The MabM repressor is 79% amino acid identity to Cluster MabG genomes, and heteroimmunity is uncertain.

<sup>4</sup>The prophigD53-3 repressor is 89% identical to other MabN's, and heteroimmunity is plausible.

<sup>5</sup>MabO repressor has 81% aa identity to imm-26 repressors, but it very similar in the putative HTH region, and homoimmunity is likely.

<sup>6</sup>Integrase is designated as being in the tyrosine-integrase (Int-Y) family or serine-integrase family (Int-S)

<sup>7</sup>Integration-dependent immunity systems are those in which the *attP* core sequence is within the repressor gene such that the gene is interrupted in the prophage state.

<sup>8</sup>Repressors identified in incomplete prophages are shown in italic type
