# Supplementary material for: The Prophage and Plasmid Mobilome as a Likely Driver of Mycobacterium abscessus Diversity
Source: PubMed Central journal article supplement (PMC8092301; doi:10.1128/mbio.03441-20), 2021-03-30
Supplement: mBio.03441-20-st003.pdf [file mBio.03441-20-st003.pdf]

Table S3. Types of Polymorphic Toxin-Immunity configurations

| <b>Tox-imm config.</b> | <b>Prototype (cluster)</b> | <b>Others</b>                                                                                            |
|------------------------|----------------------------|----------------------------------------------------------------------------------------------------------|
| a                      | prophiGD57-1 (MabC)        | prophiGD33-1 (MabC), prophigD39-2 (MabC), prophigD43A-3 (MabC), prophigD100A-2 (MabC)                    |
| b                      | prophiGD08-3 (MabF)        | prophiGD11-3 (MabF), prophigD62-2 (MabF)                                                                 |
| c                      | prophiGD21-3 (MabG)        | prophiGD24-2 (MabG, prophigD58-1 (MabG)                                                                  |
| d                      | prophiGD43A-5 (MabK)       | None                                                                                                     |
| e                      | prophiGD43A-6 (MabL)       | prophiGD88-1 (MabL)                                                                                      |
| f                      | prophiGD05-3 (MabM)        | None                                                                                                     |
| g                      | prophiGD03-1 (MabG)        | None                                                                                                     |
| h                      | prophiGD43A-1 (MabA1)      | None                                                                                                     |
| i                      | prophiGD04-1 (MabE1)       | prophiGD68-1 (MabE1) , prophigD25-1 (MabE1), prophigD54-1 (MabE1), prophigD102-2 (MabE1)                 |
| j                      | prophiGD91-4 (MabE2)       | None                                                                                                     |
| k                      | prophiGD54-2 (MabI)        | prophiGD54-2 (MabI)                                                                                      |
| l                      | prophiGD12-2 (MabD)        | prophiGD05-1 (MabD)                                                                                      |
| m                      | prophiGD108-1 (MabN)       | prophiGD62-3 (MabN)                                                                                      |
| n                      | prophiGD91-2 (MabA3)       | None                                                                                                     |
| o                      | prophiGD21-1 (MabB)        | prophiGD08-2 (MabB), prophigD11-2 (MabB), prophigD42-2 (MabB), prophigD05-2 (MabH)                       |
| p                      | prophiGD91-3 (MabO)        | None                                                                                                     |
| q                      | prophiGD34-2 (MabB)        | prophiGD62-1 (MabB)                                                                                      |
| r                      | prophiGD36-2 (MabH)        | prophiGD05-2 (MabH)                                                                                      |
| s                      | prophiGD89-1 (MabB)        | prophiGD16-1 (MabB), prophigD43A-2 (MabB)                                                                |
| t                      | prophiGD13-2 (MabC)        | prophiGD44-1 (MabC), prophigD51-1 (MabC), prophigD52-1 (MabC), prophigD91-1 (MabC), prophigD104-2 (MabC) |
| u                      | prophiGD17-1 (MabD)        | None                                                                                                     |
